# Supplementary material for: Functional copolymer brushes composed of a hydrophobic backbone and densely grafted conjugated side chains via a combination of living polymerization with click chemistry
Source: Royal Society of Chemistry journal article supplement (doi:10.1039/c2py21124f), 2013-01-01
Supplement: c2py21124f.pdf [file c2py21124f.pdf]

## Supporting Information

### Functional Copolymer Brushes Composed of Hydrophobic Backbone and Densely Grafted Conjugated Side Chains via a Combination of Living Polymerization with Click Chemistry

Xinchang Pang, Lei Zhao, Chaowei Feng, Ruifeng Wu, Haihong Ma, and Zhiqun Lin\*

School of Materials Science and Engineering, Georgia Institute of Technology,  
Atlanta, GA 30332, USA

\* To whom correspondence should be addressed. Email: [zhiqun.lin@mse.gatech.edu](mailto:zhiqun.lin@mse.gatech.edu)

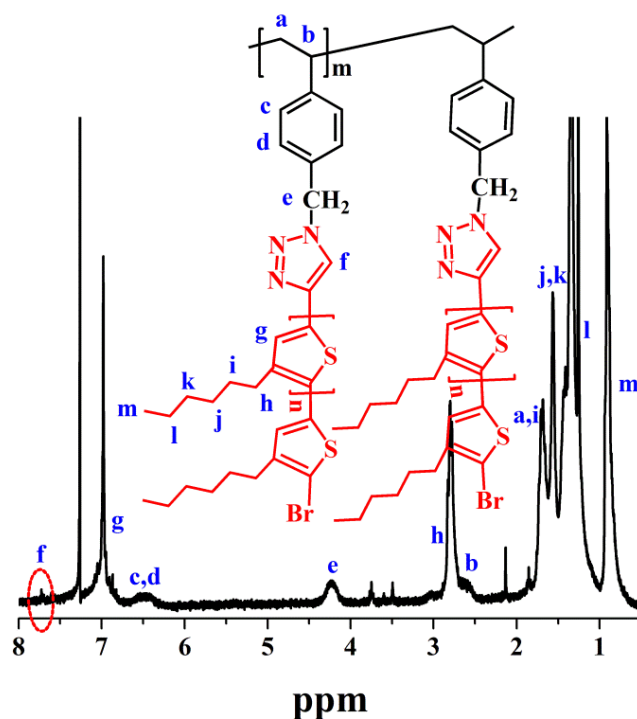

<sup>15</sup> **Figure S1.** <sup>1</sup>H-NMR spectrum of PS-g-P3HT copolymer brush (i.e., sample-b in **Table 2**) in CDCl<sub>3</sub>.

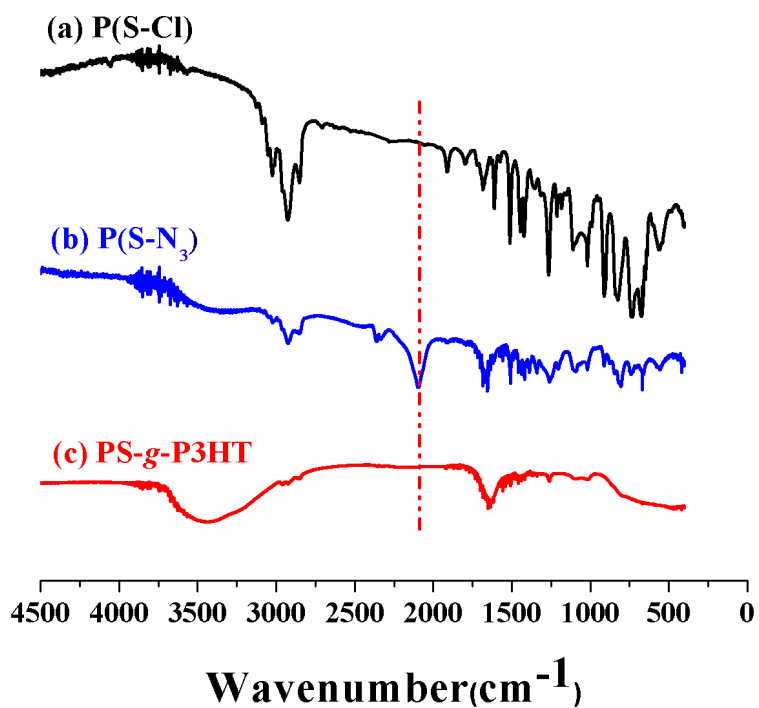

**Figure S2.** FT-IR spectra of P(S-Cl) (i.e., sample-2 in **Table 1**), PS(S-N<sub>3</sub>), and the resulting PS-g-P3HT copolymer brush (i.e., sample-b in **Table 2**).

5

10

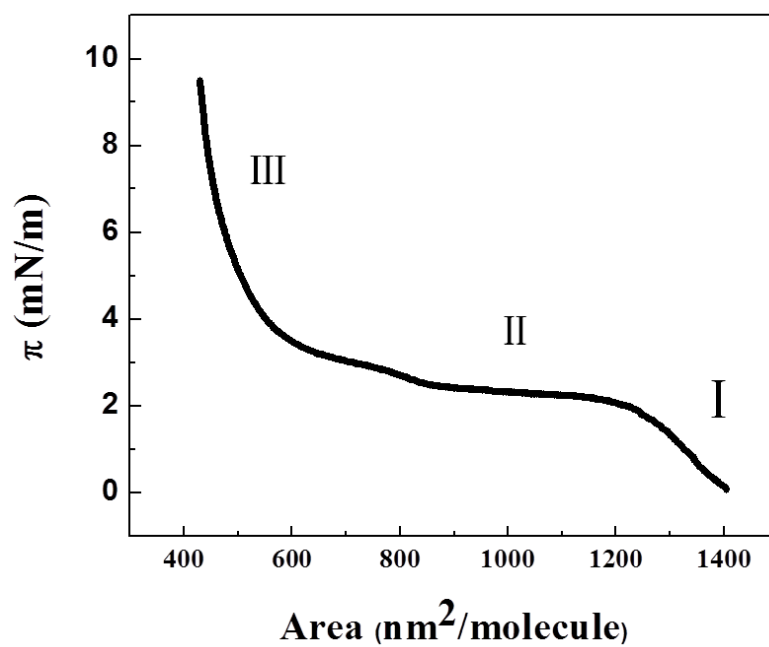

**Figure S3.** Pressure-area isotherms PS-*g*-P3HT copolymer brushes (i.e., sample-b in **Table 2**): (I) liquid state region, (II) plateau region, and (III) condensed state region.

5

10

15

20

25

30

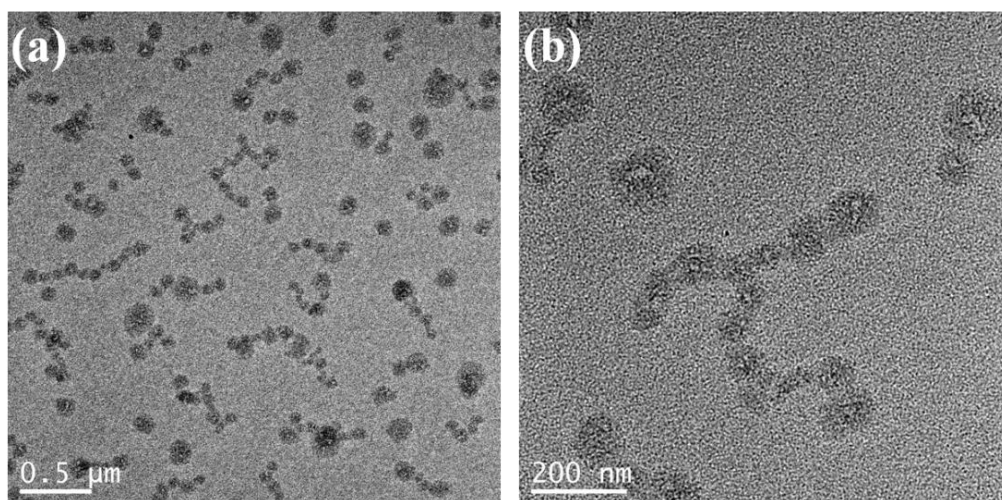

**Figure S4.** TEM images of Langmuir monolayer of PS-*g*-P3HT deposited at the gas state region. (a): scale bar = 500 nm; (b): scale bar = 200 nm.
